# Supplementary material for: Attitudes towards Freshly Made and Readily Prepared Texture-Modified Foods among Speech-Language Therapists, Dietitians, and Community-Dwelling Older Adults
Source: MDPI journal article supplement (doi:10.3390/foods11142157), 2022-07-20
Supplement: s1 [file s1]

## Supplementary File S2. Stakeholder comparisons

Median [IQR, 25-75th percentile] rating from the sensory test ( $n = 21$ )

|              | Soft and bite-sized |              | Minced and moist |                 |                 | Pureed          |                 |                 |
|--------------|---------------------|--------------|------------------|-----------------|-----------------|-----------------|-----------------|-----------------|
|              | Freshly<br>made     | Sous<br>Vide | Freshly<br>made  | Hydroly-<br>sed | Commer-<br>cial | Freshly<br>made | Hydroly-<br>sed | Commer-<br>cial |
| Appearance   |                     |              |                  |                 |                 |                 |                 |                 |
| Dietitians   | 6.0                 | 4.0          | 4.0              | 4.0             | 4.0             | 3.0             | 4.0             | 3.0             |
|              | [5.0-6.0]           | [4.0-5.5]    | [2.0-4.5]        | [3.0-5.5]       | [3.5-5.0]       | [2.0-4.5]       | [3.0-5.5]       | [2.5-5.0]       |
| SLTs         | 4.0                 | 5.0          | 6.0              | 4.0             | 4.0             | 4.0             | 4.0             | 3.0             |
|              | [3.0-4.0]           | [3.0-5.0]    | [5.0-6.0]        | [4.0-5.0]       | [3.0-5.0]       | [2.0-6.0]       | [2.0-6.0]       | [2.0-4.0]       |
| Older adults | 7.0                 | 7.0          | 5.0              | 3.0             | 2.0             | 4.0             | 2.0             | 4.0             |
|              | [7.0-7.0]           | [6.0-7.0]    | [3.5-6.0]        | [1.5-4.5]       | [1.5-4.5]       | [3.0-5.5]       | [1.0-4.0]       | [2.0-5.0]       |
| P-value      | <b>&lt;.0001</b>    | <b>.003</b>  | <b>.03</b>       | .22             | .27             | .47             | .12             | .71             |
| Flavour      |                     |              |                  |                 |                 |                 |                 |                 |
| Dietitians   | 6.0                 | 4.0          | 5.0              | 4.0             | 5.0             | 5.0             | 3.0             | 3.0             |
|              | [5.5-7.0]           | [4.0-5.5]    | [3.0-6.0]        | [3.0-5.5]       | [3.5-5.0]       | [2.0-5.5]       | [1.5-6.0]       | [1.5-4.5]       |
| SLTs         | 4.0                 | 6.0          | 5.0              | 4.0             | 4.0             | 5.0             | 4.0             | 4.0             |
|              | [3.0-5.0]           | [4.0-7.0]    | [5.0-6.0]        | [4.0-6.0]       | [3.0-5.0]       | [3.0-5.0]       | [3.0-5.0]       | [3.0-4.0]       |
| Older adults | 6.0                 | 7.0          | 4.0              | 3.0             | 3.0             | 4.0             | 2.0             | 4.0             |
|              | [6.0-7.0]           | [5.5-7.0]    | [3.5-6.5]        | [2.5-4.0]       | [2.0-3.5]       | [3.0-5.0]       | [1.0-2.5]       | [1.5-4.5]       |
| P-value      | <b>.001</b>         | .06          | .63              | .12             | .10             | .85             | .09             | .67             |
| Smell        |                     |              |                  |                 |                 |                 |                 |                 |
| Dietitians   | 6.0                 | 4.0          | 5.0              | 4.0             | 5.0             | 5.0             | 5.0             | 5.0             |
|              | [4.5-7.0]           | [4.0-6.0]    | [4.0-5.5]        | [3.5-5.5]       | [3.5-6.0]       | [4.0-6.0]       | [3.5-6.0]       | [3.5-5.0]       |
| SLTs         | 3.0                 | 5.0          | 4.0              | 5.0             | 5.0             | 5.0             | 4.0             | 3.0             |
|              | [2.0-5.0]           | [4.0-6.0]    | [3.0-5.0]        | [4.0-6.0]       | [3.0-5.0]       | [5.0-5.0]       | [4.0-6.0]       | [2.0-4.0]       |
| Older adults | 6.0                 | 5.5          | 3.5              | 2.5             | 2.0             | 4.0             | 2.0             | 3.5             |
|              | [4.3-7.0]           | [3.5-6.0]    | [3.0-5.5]        | [2.0-5.3]       | [2.0-5.0]       | [2.5-5.5]       | [1.0-4.5]       | [1.5-4.0]       |
| P-value      | <b>.01</b>          | .82          | .42              | .21             | .26             | .52             | .14             | .12             |
| Texture      |                     |              |                  |                 |                 |                 |                 |                 |
| Dietitians   | 6.0                 | 5.0          | 6.0              | 5.0             | 5.0             | 5.0             | 5.0             | 4.0             |

|                                           |            |           |           |            |             |           |            |           |
|-------------------------------------------|------------|-----------|-----------|------------|-------------|-----------|------------|-----------|
|                                           | [4.0-7.0]  | [4.5-6.0] | [3.0-6.0] | [4.0-5.5]  | [3.0-6.0]   | [3.0-5.0] | [3.0-6.0]  | [3.0-6.5] |
| SLTs                                      | 4.0        | 6.0       | 5.0       | 6.0        | 4.0         | 5.0       | 5.0        | 4.0       |
|                                           | [3.0-5.0]  | [4.0-6.0] | [4.0-6.0] | [4.0-6.0]  | [3.0-4.0]   | [4.0-5.0] | [4.0-6.0]  | [4.0-5.0] |
| Older adults                              | 5.0        | 6.0       | 4.0       | 3.0        | 2.0         | 4.0       | 2.0        | 3.0       |
|                                           | [4.0-7.0]  | [4.5-7.0] | [3.0-6.0] | [2.0-4.0]  | [1.5-4.5]   | [3.0-4.5] | [1.5-2.0]  | [1.5-4.0] |
| P-value                                   | .08        | .54       | .68       | <b>.03</b> | .07         | .44       | <b>.01</b> | .20       |
| <b>Overall rating</b>                     |            |           |           |            |             |           |            |           |
| Dietitians                                | 6.0        | 5.0       | 5.0       | 4.0        | 5.0         | 4.0       | 4.0        | 3.0       |
|                                           | [5.0-6.0]  | [4.0-6.0] | [3.0-6.0] | [3.5-5.5]  | [4.0-6.0]   | [2.5-6.0] | [2.5-6.0]  | [2.5-5.5] |
| SLTs                                      | 4.0        | 5.0       | 5.0       | 5.0        | 4.0         | 5.0       | 5.0        | 5.0       |
|                                           | [3.8-5.3]  | [4.0-6.0] | [5.0-6.0] | [4.0-5.0]  | [4.0-4.0]   | [4.0-5.0] | [3.0-5.0]  | [3.0-5.0] |
| Older adults                              | 5.0        | 7.0       | 4.0       | 3.0        | 2.0         | 4.0       | 2.0        | 3.0       |
|                                           | [4.5-7.0]  | [5.5-7.0] | [3.0-6.5] | [2.0-5.0]  | [1.5-3.5]   | [2.5-4.5] | [1.0-2.5]  | [1.5-4.0] |
| P-value                                   | .10        | .07       | .44       | .24        | <b>.005</b> | .39       | <b>.02</b> | .23       |
| <b>Meeting expectations</b>               |            |           |           |            |             |           |            |           |
| Dietitians<br>% (n)                       | 89 (8)     | 67 (6)    | 56 (5)    | 56 (5)     | 56 (5)      | 56 (5)    | 44 (4)     | 33 (3)    |
| SLTs<br>% (n)                             | 29 (2)     | 71 (5)    | 86 (6)    | 86 (6)     | 57 (4)      | 57 (4)    | 57 (4)     | 86 (6)    |
| Older adults<br>% (n)                     | 80 (4)     | 100 (5)   | 60 (3)    | 60 (3)     | 20 (1)      | 60 (3)    | 0 (0)      | 20 (1)    |
| P-value                                   | .12        | .31       | .12       | .12        | .31         | .99       | .21        | .20       |
| <b>Appropriate to the described level</b> |            |           |           |            |             |           |            |           |
| Dietitians<br>% (n)                       | 11 (1)     | 44 (4)    | 78 (7)    | 22 (2)     | 78 (7)      | 44 (4)    | 56 (5)     | 78 (7)    |
| SLTs<br>% (n)                             | 29 (2)     | 43 (3)    | 71 (5)    | 43 (3)     | 100 (7)     | 14 (1)    | 43 (3)     | 76 (6)    |
| Older adults<br>% (n)                     | 80 (4)     | 100 (5)   | 100 (5)   | 100 (5)    | 100 (5)     | 100 (5)   | 80 (4)     | 80 (4)    |
| P-value                                   | <b>.04</b> | .10       | .53       | <b>.04</b> | .23         | .05       | .75        | .93       |

Abbreviation: SLT = Speech Language Therapist.

Sensory aspects were rated on a 7-point scale, 1 = extremely poor, 7 = excellent. Expectation and appropriateness questions were answered by “yes, no or not sure”.

A Kruskal-Wallis test was performed to test the significance between stakeholder groups. Chi-square tests were performed to compare the categorical variables.  $p < .05$  indicates significance.
